# Supplementary material for: Changes of Volatile Flavor Compounds in Sea Buckthorn Juice during Fermentation Based on Gas Chromatography–Ion Mobility Spectrometry
Source: MDPI journal article supplement (doi:10.3390/foods11213471), 2022-11-01
Supplement: s1 [file s1]

## Supplementary material

**Table S1.** Sensory evaluation criteria and intensity for sea buckthorn fermented juice

| Sensory attributes | Criteria                            | Intensity |
|--------------------|-------------------------------------|-----------|
| Fruity             | Pure fruity of sea buckthorn        | 9         |
|                    | Light fruity of sea buckthorn       | 4.5       |
|                    | Not obvious aroma or peculiar smell | 0         |
| Appearance         | Normal orange, no stratification    | 9         |
|                    | Normal orange, stratified           | 4.5       |
|                    | Orange become light, layered        | 0         |
| Sweet and sour     | Sour or sweet suitable, mild taste  | 9         |
|                    | More sweet or more sour             | 4.5       |
|                    | Hard to accept                      | 0         |
| Sweet odor         | Smells pure honey sweet             | 9         |
|                    | Smells slight honey sweet           | 4.5       |
|                    | Not obvious                         | 0         |
| Bitterness         | Not obvious                         | 9         |
|                    | Light                               | 4.5       |
|                    | Heavy                               | 0         |
